# Supplementary material for: Precise, wide field, and low-cost imaging and analysis of core–shell beads for digital polymerase chain reaction
Source: Royal Society of Chemistry journal article supplement (doi:10.1039/d3lc00337j), 2023-01-01

## Supporting Information

**SI Figure 1:** A standard curve for eight serial dilutions of DNA ranging from 13,980,000 copies/reaction to 1.398 copies/reaction.

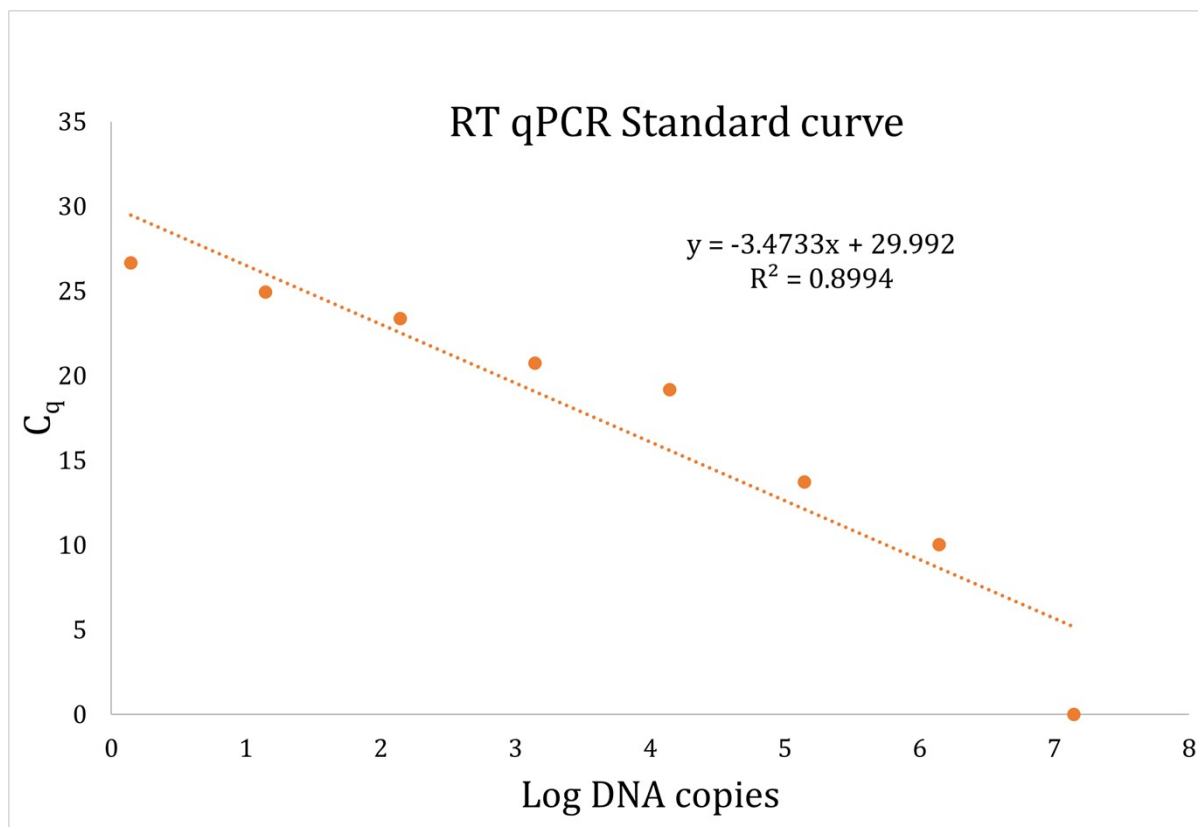

Supplement: d3lc00337j2.pdf [file d3lc00337j2.pdf]
